# Supplementary material for: Modulation of Functional Connectivity in Response to Mirror Visual Feedback in Stroke Survivors: An MEG Study
Source: MDPI journal article supplement (doi:10.3390/brainsci11101284), 2021-09-28
Supplement: s1 [file s1]

## **Modulation of Functional Connectivity in Response to Mirror Visual Feedback in Stroke Survivors: An MEG Study**

**Authors:** Ruei-Yi Tai, MD, Jun-Ding Zhu, MS, Chih-Chi Chen, MD, Yu-Wei Hsieh, PhD\*, Chia-Hsiung Cheng, PhD\*

**Supplementary material**

**Supplementary Table S1.** Cortical coherence between any 2 brain regions of interest in theta band under 3 experimental conditions

| <b>Conditions</b>       | M1<br>_V1 | STG<br>_V1 | PCC<br>_V1 | Precuneus<br>_V1 | STG<br>_M1 | PCC<br>_M1 | Precuneus<br>_M1 | PCC<br>_STG | Precuneus<br>_STG | Precuneus<br>_PCC |
|-------------------------|-----------|------------|------------|------------------|------------|------------|------------------|-------------|-------------------|-------------------|
| Bilateral-No mirror     |           |            |            |                  |            |            |                  |             |                   |                   |
| Median                  | 0.009     | 0.030      | 0.021      | 0.044            | 0.040      | 0.046      | 0.034            | 0.068       | 0.035             | 0.067             |
| IQR                     | 0.011     | 0.040      | 0.027      | 0.038            | 0.035      | 0.021      | 0.045            | 0.068       | 0.050             | 0.042             |
| Bilateral-Mirror        |           |            |            |                  |            |            |                  |             |                   |                   |
| Median                  | 0.008     | 0.024      | 0.023      | 0.068            | 0.036      | 0.053      | 0.033            | 0.067       | 0.039             | 0.084             |
| IQR                     | 0.009     | 0.014      | 0.023      | 0.057            | 0.022      | 0.051      | 0.035            | 0.068       | 0.047             | 0.052             |
| Unilateral-Mirror       |           |            |            |                  |            |            |                  |             |                   |                   |
| Median                  | 0.010     | 0.026      | 0.038      | 0.054            | 0.041      | 0.055      | 0.042            | 0.064       | 0.037             | 0.082             |
| IQR                     | 0.011     | 0.047      | 0.044      | 0.039            | 0.039      | 0.032      | 0.037            | 0.044       | 0.029             | 0.057             |
| <b>Adjusted P value</b> |           |            |            |                  |            |            |                  |             |                   |                   |
| Bilateral-No mirror     |           |            |            |                  |            |            |                  |             |                   |                   |
| vs.                     | 0.46      | 0.15       | 0.54       | 0.08†            | 0.50       | 0.13       | 0.49             | 0.50        | 0.54              | 0.11              |
| Bilateral-Mirror        |           |            |            |                  |            |            |                  |             |                   |                   |
| Bilateral-Mirror        |           |            |            |                  |            |            |                  |             |                   |                   |
| vs.                     | 0.57      | 0.62       | 0.53       | 0.70             | 0.48       | 0.65       | 0.52             | 0.47        | 0.50              | 0.60              |
| Unilateral-Mirror       |           |            |            |                  |            |            |                  |             |                   |                   |

The coherence strength is demonstrated by values of median and IQR. The results of the comparison of cortical coherence between different experimental conditions are demonstrated by adjusted p value. † represents an approached significant difference

IQR: interquartile range, M1: primary motor cortex, PCC: posterior cingulate cortex, STG: superior temporal gyrus, V1: primary visual cortex

**Supplementary Table S2.** Cortical coherence between any 2 brain regions of interest in the alpha band under 3 experimental conditions

| Conditions              | M1<br>_V1 | STG<br>_V1 | PCC<br>_V1 | Precuneus<br>_V1 | STG<br>_M1 | PCC<br>_M1 | Precuneus<br>_M1 | PCC<br>_STG | Precuneus<br>_STG | Precuneus<br>_PCC |
|-------------------------|-----------|------------|------------|------------------|------------|------------|------------------|-------------|-------------------|-------------------|
| Bilateral-No mirror     |           |            |            |                  |            |            |                  |             |                   |                   |
| Median                  | 0.007     | 0.014      | 0.025      | 0.062            | 0.035      | 0.052      | 0.031            | 0.046       | 0.020             | 0.073             |
| IQR                     | 0.011     | 0.025      | 0.016      | 0.051            | 0.021      | 0.031      | 0.053            | 0.039       | 0.017             | 0.043             |
| Bilateral-Mirror        |           |            |            |                  |            |            |                  |             |                   |                   |
| Median                  | 0.006     | 0.014      | 0.016      | 0.067            | 0.037      | 0.053      | 0.025            | 0.055       | 0.019             | 0.070             |
| IQR                     | 0.009     | 0.018      | 0.029      | 0.042            | 0.027      | 0.030      | 0.033            | 0.024       | 0.031             | 0.045             |
| Unilateral-Mirror       |           |            |            |                  |            |            |                  |             |                   |                   |
| Median                  | 0.005     | 0.015      | 0.027      | 0.062            | 0.035      | 0.059      | 0.037            | 0.059       | 0.021             | 0.087             |
| IQR                     | 0.014     | 0.041      | 0.017      | 0.063            | 0.041      | 0.025      | 0.034            | 0.026       | 0.021             | 0.027             |
| <b>Adjusted P value</b> |           |            |            |                  |            |            |                  |             |                   |                   |
| Bilateral-No mirror     |           |            |            |                  |            |            |                  |             |                   |                   |
| vs.                     | 0.38      | 0.50       | 0.38       | 0.19             | 0.43       | 0.35       | 0.39             | 0.23        | 0.28              | 0.32              |
| Bilateral-Mirror        |           |            |            |                  |            |            |                  |             |                   |                   |
| Bilateral-Mirror        |           |            |            |                  |            |            |                  |             |                   |                   |
| vs.                     | 0.65      | 0.81       | 0.45       | 1.00             | 0.48       | 0.57       | 1.00             | 0.49        | 0.95              | 0.45              |
| Unilateral-Mirror       |           |            |            |                  |            |            |                  |             |                   |                   |

The coherence strength is demonstrated by values of median and IQR. The results of the comparison of cortical coherence between different experimental conditions are demonstrated by adjusted p value. There was no significant difference in each comparison.

**Supplementary Table S3.** Cortical coherence between any 2 brain regions of interest in the beta band under 3 experimental conditions

| Conditions              | M1<br>_V1 | STG<br>_V1 | PCC<br>_V1 | Precuneus<br>_V1 | STG<br>_M1 | PCC<br>_M1 | Precuneus<br>_M1 | PCC<br>_STG | Precuneus<br>_STG | Precuneus<br>_PCC |
|-------------------------|-----------|------------|------------|------------------|------------|------------|------------------|-------------|-------------------|-------------------|
| Bilateral-No mirror     |           |            |            |                  |            |            |                  |             |                   |                   |
| Median                  | 0.008     | 0.023      | 0.025      | 0.037            | 0.024      | 0.038      | 0.026            | 0.041       | 0.015             | 0.066             |
| IQR                     | 0.005     | 0.023      | 0.030      | 0.028            | 0.024      | 0.013      | 0.024            | 0.018       | 0.014             | 0.023             |
| Bilateral-Mirror        |           |            |            |                  |            |            |                  |             |                   |                   |
| Median                  | 0.008     | 0.015      | 0.033      | 0.047            | 0.020      | 0.051      | 0.033            | 0.041       | 0.016             | 0.063             |
| IQR                     | 0.006     | 0.016      | 0.016      | 0.055            | 0.018      | 0.030      | 0.032            | 0.014       | 0.011             | 0.031             |
| Unilateral-Mirror       |           |            |            |                  |            |            |                  |             |                   |                   |
| Median                  | 0.007     | 0.019      | 0.026      | 0.037            | 0.030      | 0.040      | 0.035            | 0.042       | 0.016             | 0.063             |
| IQR                     | 0.008     | 0.025      | 0.017      | 0.042            | 0.018      | 0.016      | 0.023            | 0.032       | 0.016             | 0.034             |
| <b>Adjusted P value</b> |           |            |            |                  |            |            |                  |             |                   |                   |
| Bilateral-No mirror     |           |            |            |                  |            |            |                  |             |                   |                   |
| vs.                     | 0.49      | 0.24       | 0.41       | 0.35             | 0.43       | 0.04*      | 0.43             | 0.57        | 0.40              | 0.35              |
| Bilateral-Mirror        |           |            |            |                  |            |            |                  |             |                   |                   |
| Bilateral-Mirror        |           |            |            |                  |            |            |                  |             |                   |                   |
| vs.                     | 0.45      | 0.43       | 0.38       | 0.48             | 0.19       | 0.10       | 0.42             | 0.47        | 0.45              | 0.33              |
| Unilateral-Mirror       |           |            |            |                  |            |            |                  |             |                   |                   |

The coherence strength is demonstrated by values of median and IQR. The results of the comparison of cortical coherence between different experimental conditions are demonstrated by adjusted p value. \* represents a significant difference (adjusted  $p < 0.05$ )

**Supplementary Table S4.** Cortical coherence between any 2 brain regions of interest in the gamma band under 3 experimental conditions

| Conditions              | M1<br>_V1 | STG<br>_V1 | PCC<br>_V1 | Precuneus<br>_V1 | STG<br>_M1 | PCC<br>_M1 | Precuneus<br>_M1 | PCC<br>_STG | Precuneus<br>_STG | Precuneus<br>_PCC |
|-------------------------|-----------|------------|------------|------------------|------------|------------|------------------|-------------|-------------------|-------------------|
| Bilateral-No mirror     |           |            |            |                  |            |            |                  |             |                   |                   |
| Median                  | 0.010     | 0.016      | 0.035      | 0.045            | 0.033      | 0.042      | 0.027            | 0.058       | 0.022             | 0.080             |
| IQR                     | 0.007     | 0.014      | 0.021      | 0.026            | 0.028      | 0.021      | 0.008            | 0.033       | 0.023             | 0.050             |
| Bilateral-Mirror        |           |            |            |                  |            |            |                  |             |                   |                   |
| Median                  | 0.008     | 0.016      | 0.037      | 0.049            | 0.018      | 0.043      | 0.023            | 0.048       | 0.025             | 0.079             |
| IQR                     | 0.005     | 0.015      | 0.025      | 0.042            | 0.024      | 0.035      | 0.021            | 0.037       | 0.018             | 0.039             |
| Unilateral-Mirror       |           |            |            |                  |            |            |                  |             |                   |                   |
| Median                  | 0.008     | 0.015      | 0.032      | 0.046            | 0.017      | 0.044      | 0.025            | 0.037       | 0.016             | 0.078             |
| IQR                     | 0.004     | 0.015      | 0.013      | 0.049            | 0.027      | 0.018      | 0.028            | 0.033       | 0.011             | 0.043             |
| <b>Adjusted P value</b> |           |            |            |                  |            |            |                  |             |                   |                   |
| Bilateral-No mirror     |           |            |            |                  |            |            |                  |             |                   |                   |
| vs.                     | 0.49      | 0.55       | 0.48       | 0.52             | 0.95       | 0.71       | 0.45             | 0.48        | 0.57              | 0.60              |
| Bilateral-Mirror        |           |            |            |                  |            |            |                  |             |                   |                   |
| Bilateral-Mirror        |           |            |            |                  |            |            |                  |             |                   |                   |
| vs.                     | 0.46      | 0.50       | 0.45       | 0.48             | 0.43       | 0.71       | 0.61             | 0.76        | 1.00              | 0.91              |
| Unilateral-Mirror       |           |            |            |                  |            |            |                  |             |                   |                   |

The coherence strength is demonstrated by values of median and IQR. The results of the comparison of cortical coherence between different experimental conditions are demonstrated by adjusted p value. There was no significant difference in each comparison.
